# Supplementary material for: 4-Mercaptobenzoic acid as a MALDI matrix for highly sensitive analysis of metals
Source: Royal Society of Chemistry journal article supplement (doi:10.1039/d1an00022e), 2021-01-01
Supplement: d1an00022e1.pdf [file d1an00022e1.pdf]

## Supporting information for

### 4-Mercaptobenzoic Acid as a MALDI matrix for Highly Sensitive Analysis of Metals

Qianqian Sun,<sup>a</sup> Shasha Zhang,<sup>a</sup> Weini Huang,<sup>a</sup> Ran Wang,<sup>a</sup> Zihan Chen,<sup>a</sup> Zongwei Cai,<sup>b</sup> Zian Lin<sup>a\*</sup>

†. Ministry of Education Key Laboratory of Analytical Science for Food Safety and Biology, Fujian Provincial Key Laboratory of Analysis and Detection Technology for Food Safety, College of Chemistry, Fuzhou University, Fuzhou, Fujian, 350108, China

‡. State Key Laboratory of Environmental and Biological Analysis, Department of Chemistry, Hong Kong Baptist University, 224 Waterloo Road, Kowloon Tong, 999077, Hong Kong, SAR, P. R. China

- **Corresponding author:** Zian Lin;
- **Postal address:** College of Chemistry, Fuzhou University, Fuzhou, Fujian 350108, China
- **Fax:** 86-591-22866135
- E-mail:** zianlin@fzu.edu.cn (Z. Lin);

Table of Contents

#### 1. SUPPORTING INFORMATION-FIGURES

## 2. TABLE

### Supporting Information-Figures

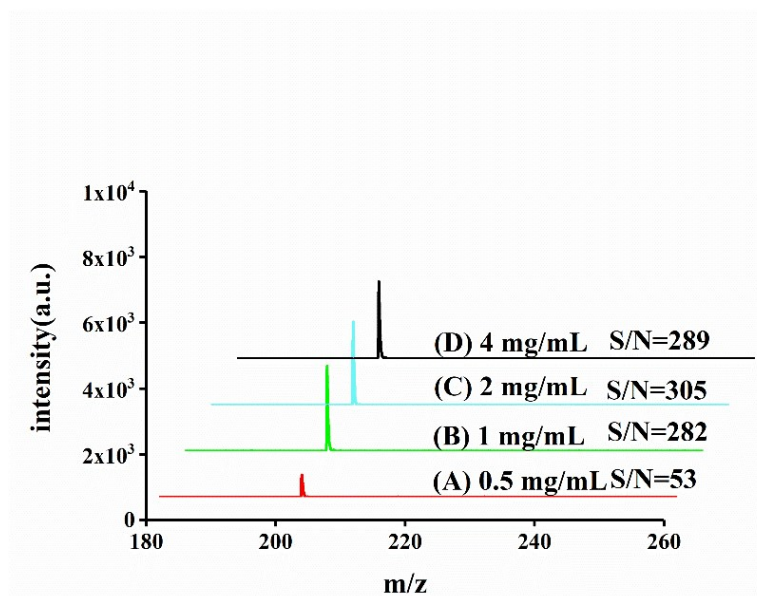

**Figure S1.** Effect of MBA concentration on the MS signal intensities of  $\text{Hg}^{2+}$ . (A) 0.5 mg/mL; (B) 1 mg/mL; (C) 2 mg/mL; (D) 4 mg/mL.

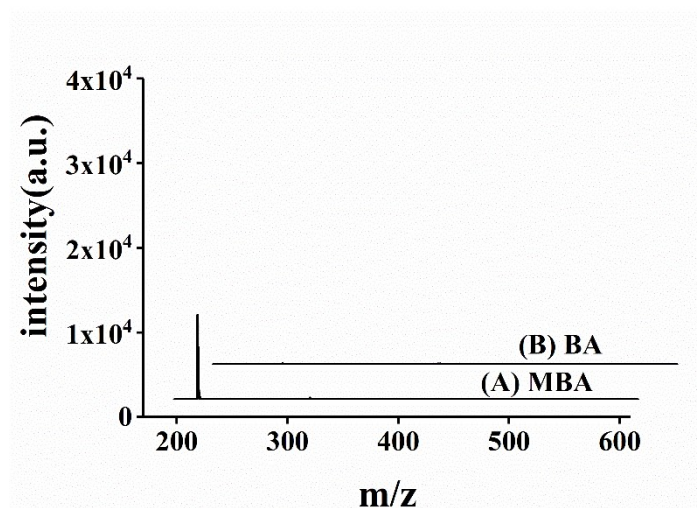

**Figure S2.** Comparison of different matrices for the analysis of  $\text{Hg}^{2+}$  based on MALDI-TOF-MS. (A) MBA; (B) BA.

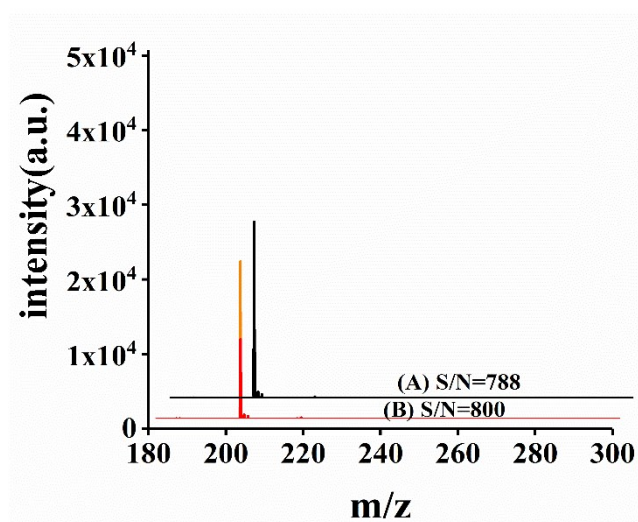

**Figure S3.** The MS spectra of  $\text{Hg}^{2+}$  based on MALDI-TOF-MS. (A) MBA solution newly prepared; (B) MBA solution after storage for 60 days.

**Table S1.** LODs with MBA-assisted LDI-TOF-MS for the detection of Hg<sup>2+</sup> and Cd<sup>2+</sup>.

| Analytes | LODs (ng/mL) |
|----------|--------------|
| Hg       | 0.15         |
| Cd       | 0.05         |

**Table S2.** The reproducibility of the analysis of  $\text{Hg}^{2+}$  and  $\text{Cd}^{2+}$  with MBA-assisted LDI-TOF-MS.

| Analytes | shot-to-shot RSD<br>(n=6)[a] | sample-to-sample RSD<br>(n=3)[b] |
|----------|------------------------------|----------------------------------|
| Hg       | 6%                           | 2%                               |
| Cd       | 7%                           | 5%                               |

[a] The shot-to-shot RSDs were measured based on 6 shots at different locations on the matrix.

[b] The sample-to-sample RSDs were measured based on 3 samples in different batches.

**Table S3.** Peak intensities of metals in MBA-assisted LDI-TOF-MS and concentrations determined by ICP-MS in  $\text{PM}_{2.5}$  samples.

| Months   | Cd             |           | Hg             |           |
|----------|----------------|-----------|----------------|-----------|
|          | Peak intensity | C (ng/mL) | Peak intensity | C (ng/mL) |
| January  | 2575±222       | 6.89      | 530±14         | 5.89      |
| February | 1600±189       | 3.07      | 279±29         | 3.24      |
| March    | 1476±91        | 2.40      | 360±35         | 3.79      |

|           |          |      |        |      |
|-----------|----------|------|--------|------|
| April     | 1040±32  | 1.60 | 157±32 | 1.16 |
| May       | 982±109  | 1.44 | 138±12 | 0.93 |
| June      | 992±113  | 1.16 | 115±6  | 0.51 |
| July      | 1273±134 | 1.94 | 139±16 | 0.60 |
| August    | 1027±145 | 1.31 | 144±18 | 1.01 |
| September | 1265±165 | 1.80 | 124±8  | 0.77 |
| October   | 1100±87  | 1.49 | 146±19 | 1.00 |
| November  | 1385±133 | 2.44 | 241±11 | 2.82 |
| December  | 1623±139 | 3.02 | 406±31 | 4.20 |

---
